# Supplementary material
Source: PubMed Central journal article supplement (PMC3588871)
Supplement: supp_M031963_jlr.M031963-1.pdf [file supp_M031963_jlr.M031963-1.pdf]

## SUPPLEMENTAL DATA

### CASPASE-1 DEFICIENCY IN MICE REDUCES INTESTINAL TRIGLYCERIDE ABSORPTION AND HEPATIC TRIGLYCERIDE SECRETION

Janna A. van Diepen<sup>1,5,\*</sup>, Rinke Stienstra<sup>5,6\*</sup>, Irene O.C.M. Vroegrijk<sup>1</sup>, Sjoerd A.A. van den Berg<sup>2</sup>, Daniela Salvatori<sup>3</sup>, Guido J. Hooiveld<sup>6</sup>, Sander Kersten<sup>6</sup>, Cees J. Tack<sup>5</sup>, Mihai G. Netea<sup>5</sup>, Johannes W.A. Smit<sup>1,5</sup>, Leo A.B. Joosten<sup>5</sup>, Louis M. Havekes<sup>1,4,7</sup>, Ko Willems van Dijk<sup>1,2</sup>, Patrick C.N. Rensen<sup>1</sup>

Depts. of <sup>1</sup>General Internal Medicine, Endocrinology and Metabolic Diseases, <sup>2</sup>Human Genetics, <sup>3</sup>Anatomy and Embryology and <sup>4</sup>Cardiology, Leiden University Medical Center, Leiden, The Netherlands; <sup>5</sup>Dept. of Medicine, Radboud University Nijmegen Medical Centre, and Nijmegen Institute for Infection, Inflammation and Immunity (N4i), Nijmegen, The Netherlands; <sup>6</sup>Nutrition, Metabolism, and Genomics group, Division of Human Nutrition, Wageningen University, Wageningen; <sup>7</sup>Netherlands Organization for Applied Scientific Research-Biosciences, Gaubius Laboratory, Leiden, The Netherlands.

- Supplemental Figure S1:** Oil Red O staining of jejunum of caspase-1<sup>-/-</sup> and wild-type mice.
- Supplemental Figure S2:** HE staining of duodenum, jejunum and ileum of caspase-1<sup>-/-</sup> and wild-type mice
- Supplemental Figure S3:** Fecal cholesterol and phospholipid content is similar between caspase-1<sup>-/-</sup> and wild-type mice.
- Supplemental Figure S4:** Caspase-1 deficiency does not affect hepatic MTP and DGAT1 protein levels, but tends to reduce SREBP1c levels.
- Supplemental Figure S5:** Caspase-1 deficiency does not affect plasma  $\beta$ -hydroxybutyrate levels.

WT

Casp1<sup>-/-</sup>

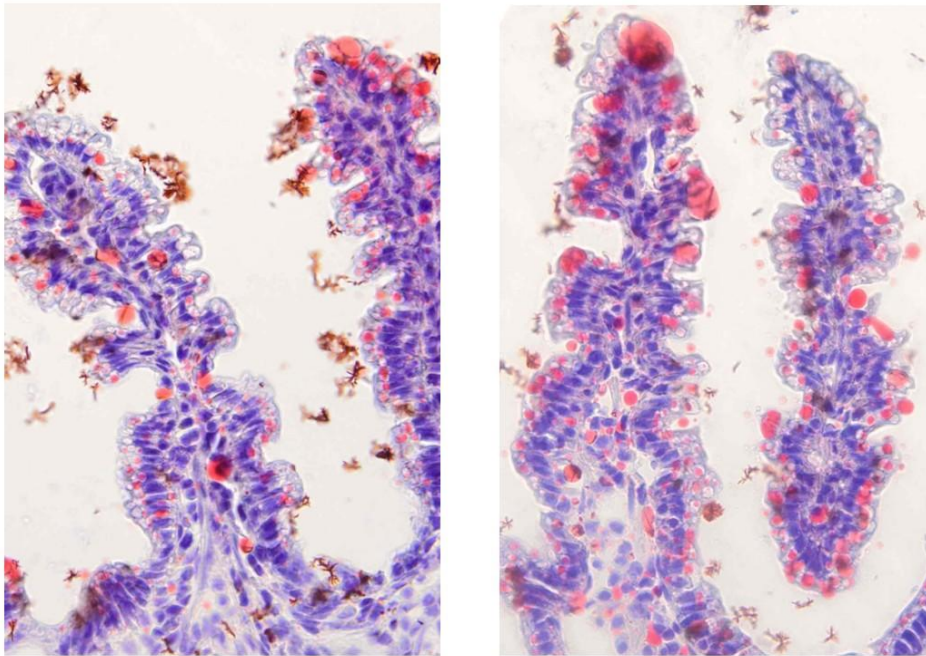

**Supplemental Figure S1.** Oil Red O staining of jejunum of caspase-1<sup>-/-</sup> and wild-type mice. Jejunum was obtained from from caspase-1<sup>-/-</sup> (Casp1<sup>-/-</sup>) and wild-type (WT) mice 2 h after an oral lipid load with olive oil. Frozen sections were stained with Oil Red O. No differences for lipid content of enterocytes was observed between genotypes. 40x magnification.

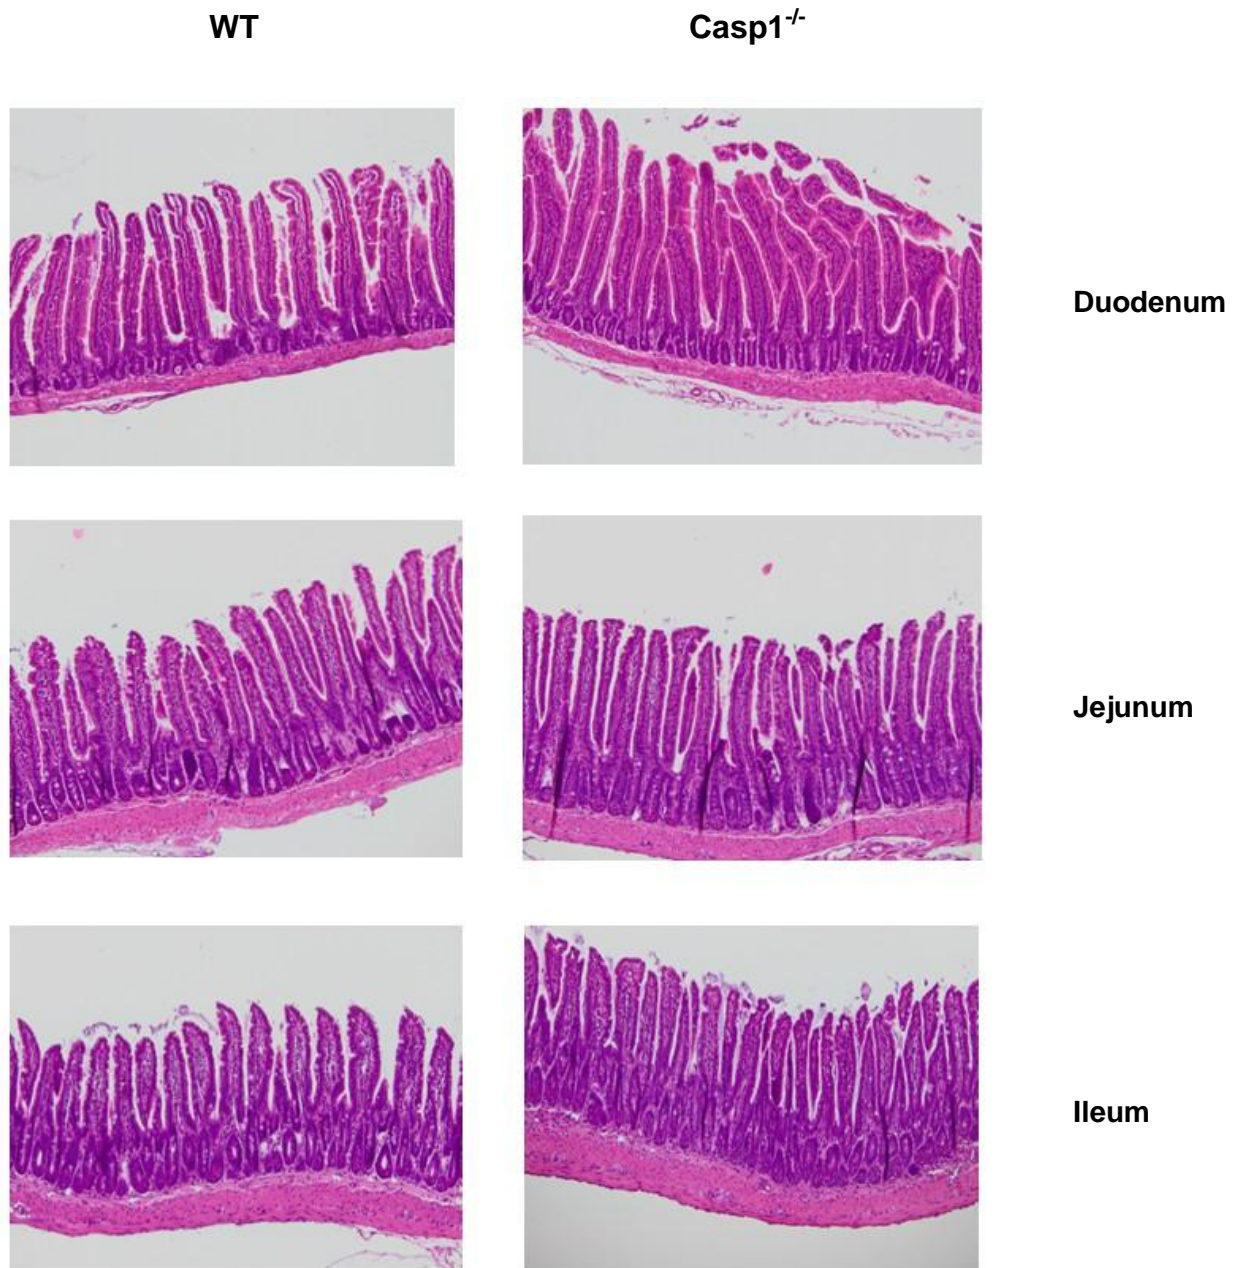

**Supplemental Figure S2.** HE staining of duodenum, jejunum and ileum of caspase-1<sup>-/-</sup> and wild-type mice.

Intestinal tract was obtained from caspase-1<sup>-/-</sup> (Casp1<sup>-/-</sup>) and wild-type (WT) mice. Paraffin embedded tissues were stained with HE. No differences were observed in morphology between genotypes. 10x magnification.

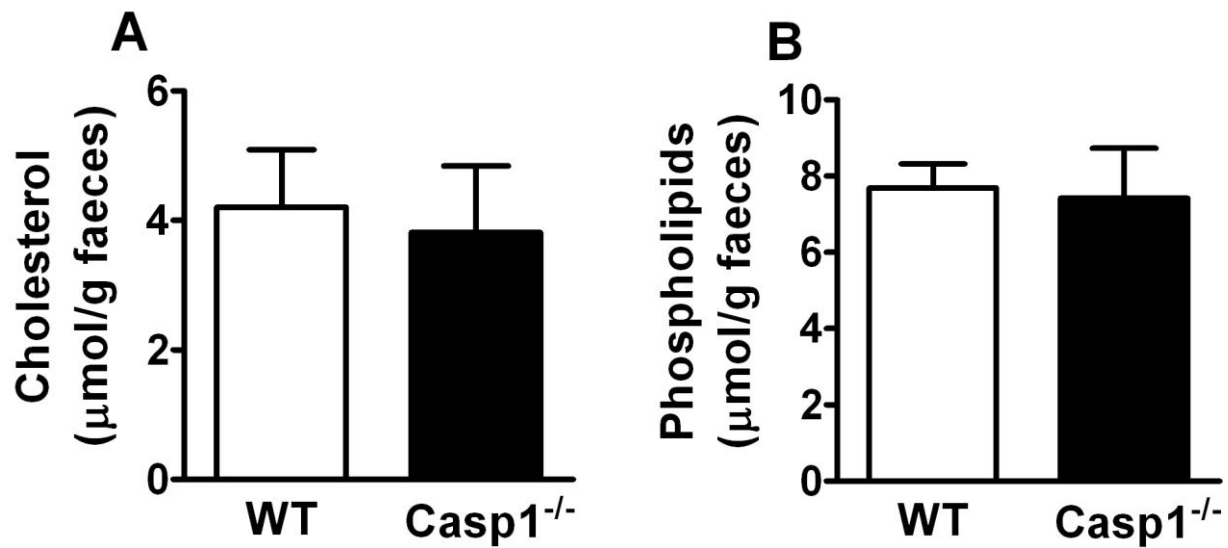

**Supplemental Figure S3.** Fecal cholesterol and phospholipid content is similar between caspase-1<sup>-/-</sup> and wild-type mice.

Feces were collected from individually housed wild-type (WT) and caspase-1<sup>-/-</sup> (Casp1<sup>-/-</sup>) mice fed a chow diet and fecal cholesterol (A) and phospholipids (B) were determined. Values are means  $\pm$  SD (n=8).

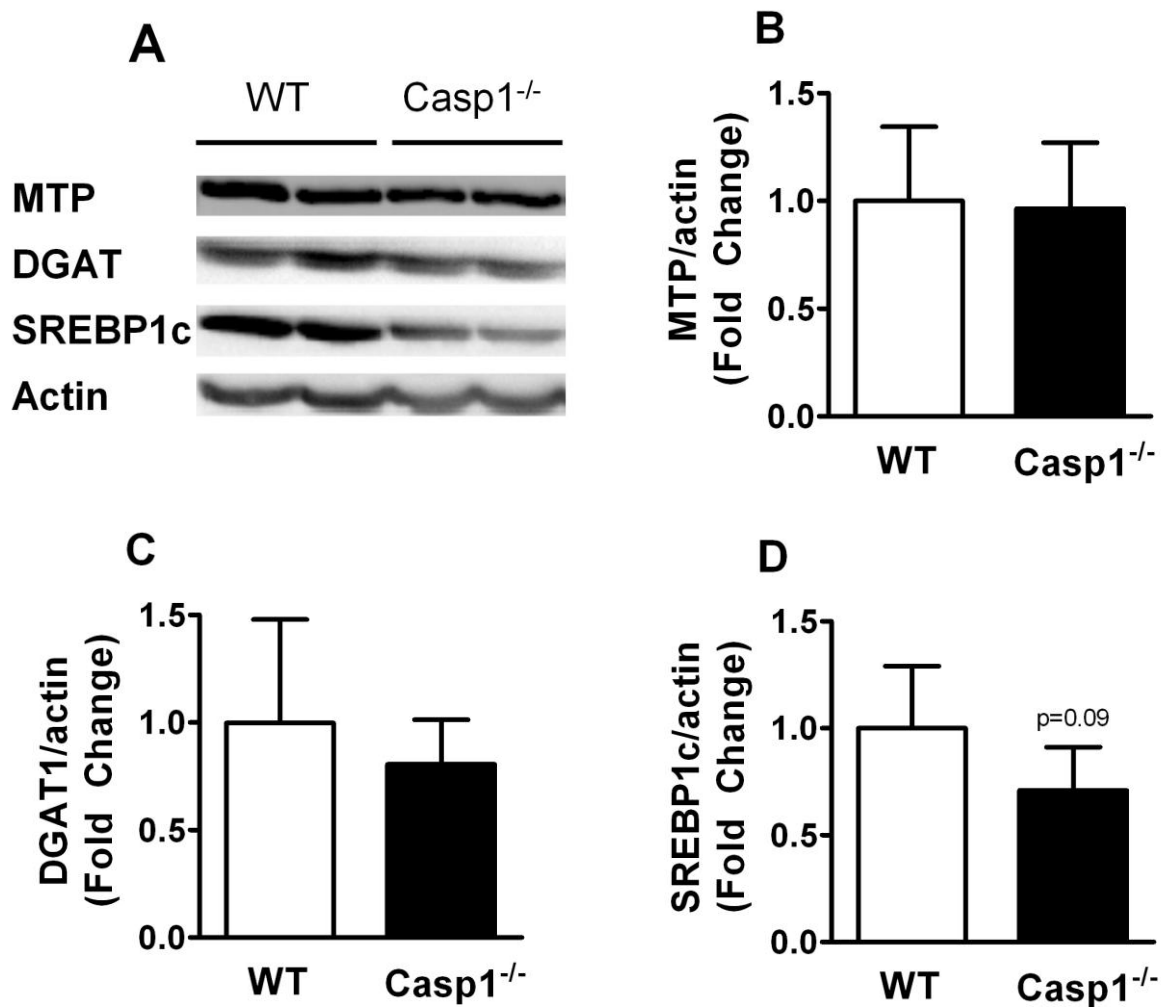

**Supplemental Figure S4.** Caspase-1 deficiency does not affect hepatic MTP and DGAT1 protein levels, but tends to reduce SREBP1c levels.

Caspase-1<sup>-/-</sup> (Casp1<sup>-/-</sup>) and wild-type (WT) mice were fed a chow diet and sacrificed after a 4 h fast. MTP, DGAT1 and SREBP1c levels were measured in liver tissue by Western blots and Actin was used as an internal control. Representative Western blots are shown for 2 mice per group (A,B,C). Ratios of MTP (D), DGAT1 (E), SREBP1c (F) proteins over Actin levels were quantified. Values are means ± SD (n=5-6).

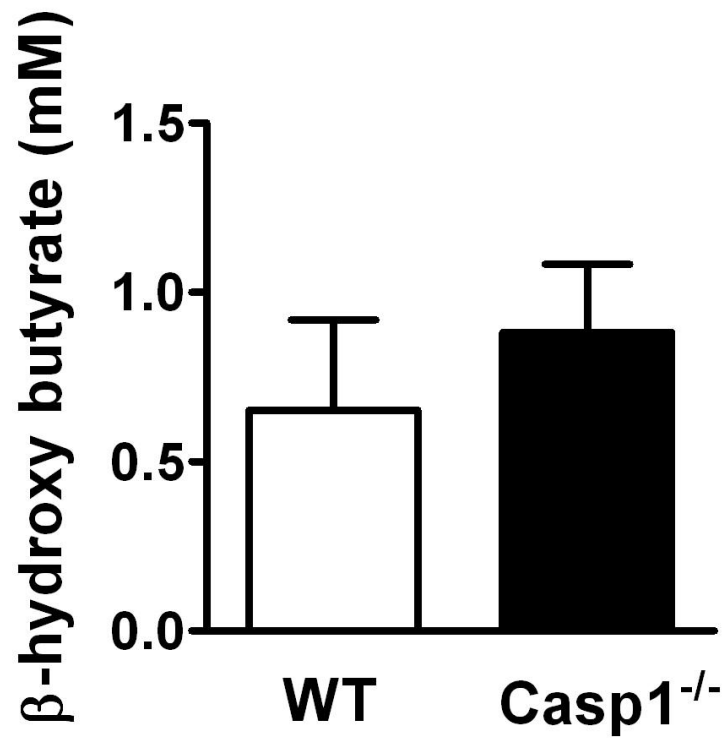

**Supplemental Figure S5.** Caspase-1 deficiency does not affect plasma  $\beta$ -hydroxybutyrate levels.

Caspase-1<sup>-/-</sup> ( $Casp1^{-/-}$ ) and wild-type (WT) mice were fasted for 4 h and  $\beta$ -hydroxybutyrate was determined in plasma. Values are means  $\pm$  SD (n=5-6).
